# Supplementary material
Source: PubMed Central journal article supplement (PMC3808965)
Supplement: NIHMS248659-supplement-Supplementary_Figures.pdf [file NIHMS248659-supplement-Supplementary_Figures.pdf]

**a**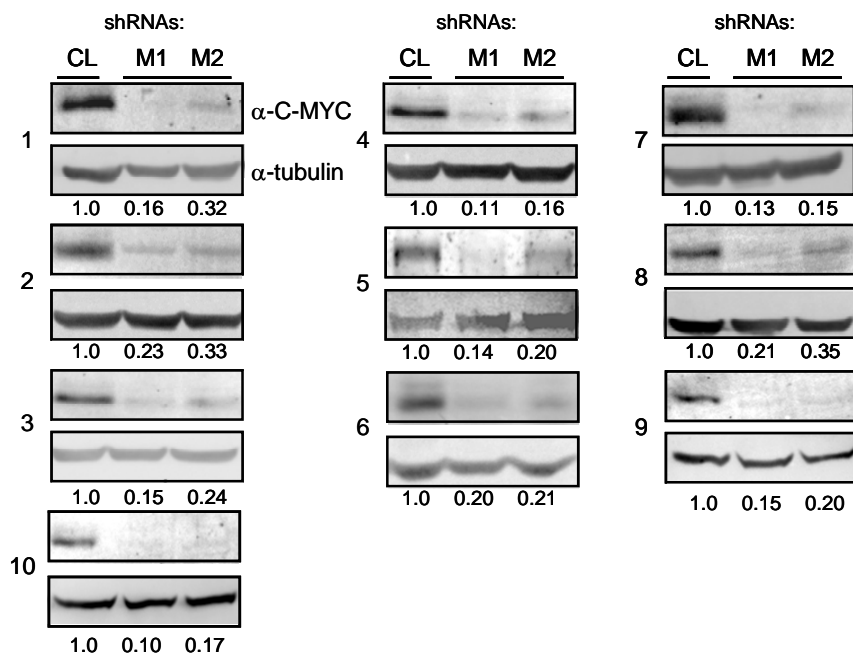**b****SK-Mel-94 (5)**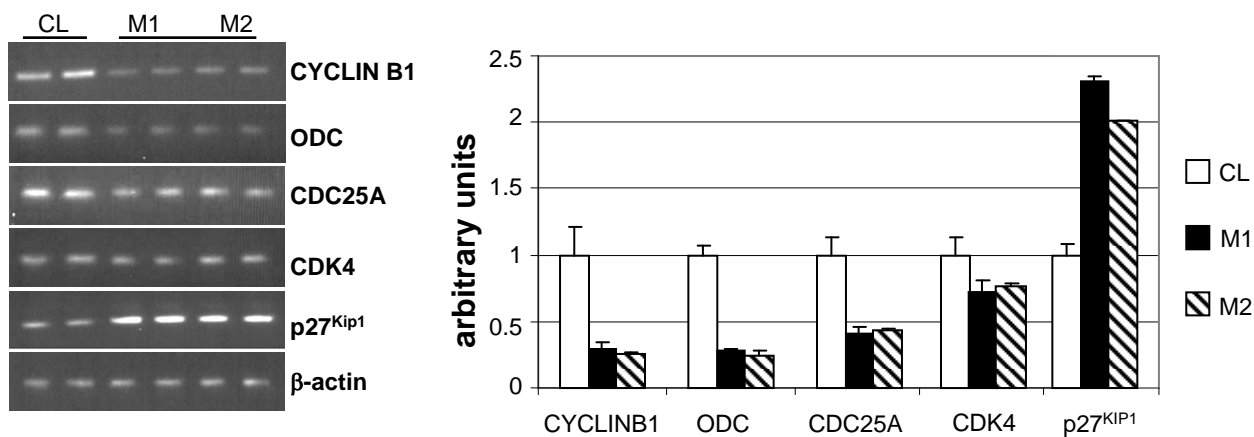**c**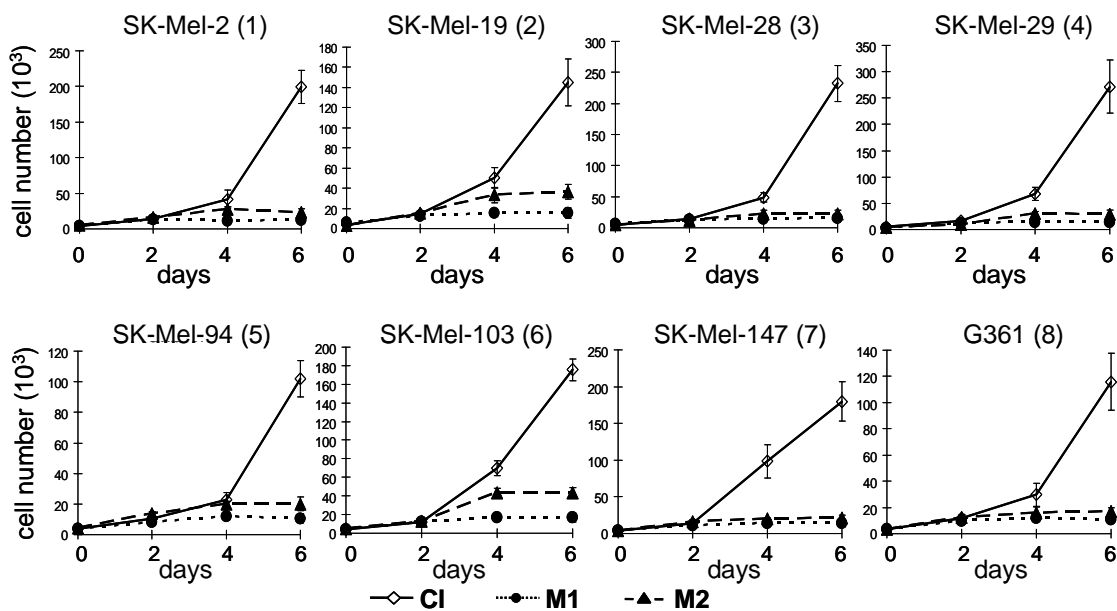**Figure S1**

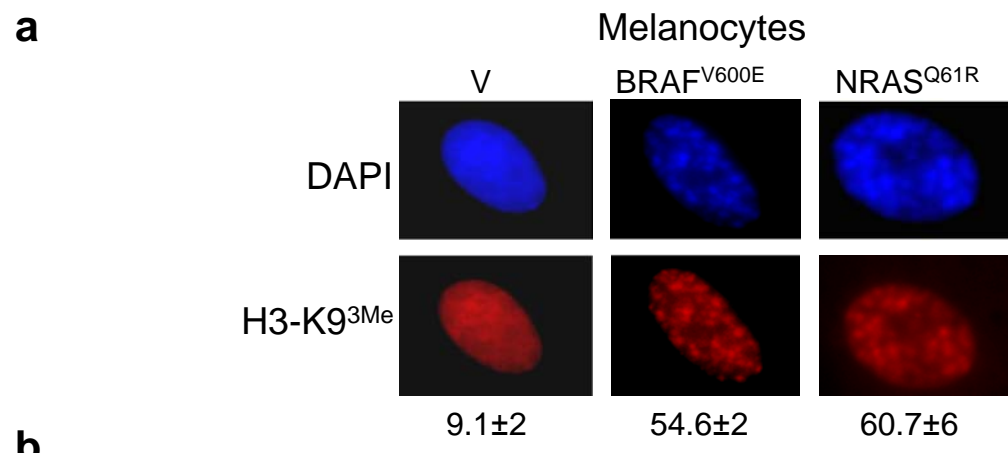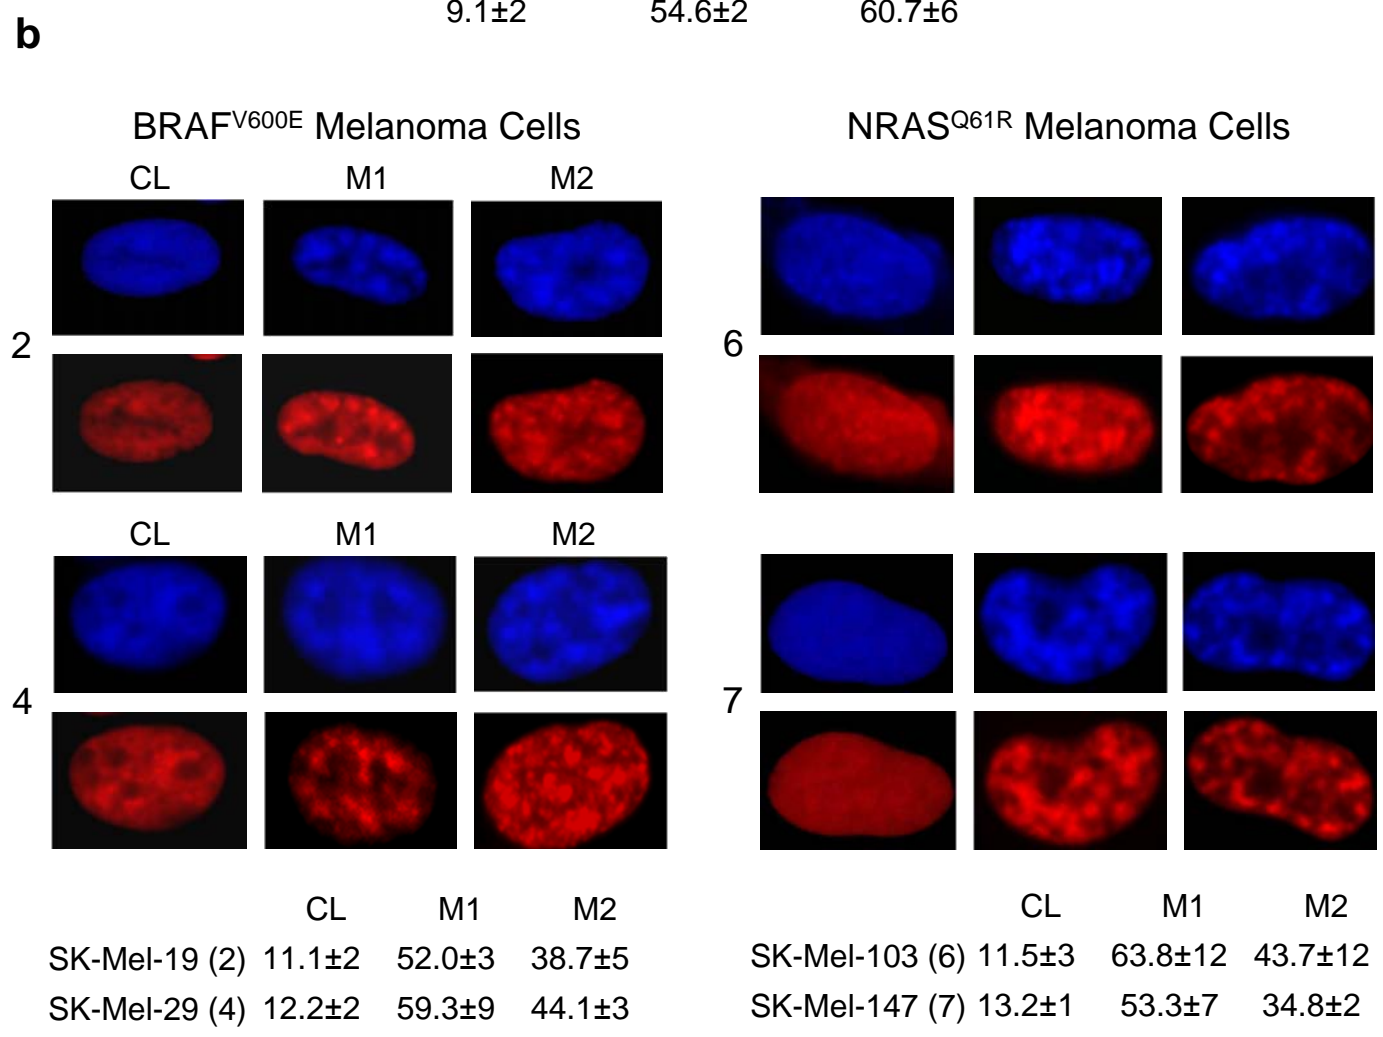

Figure S2

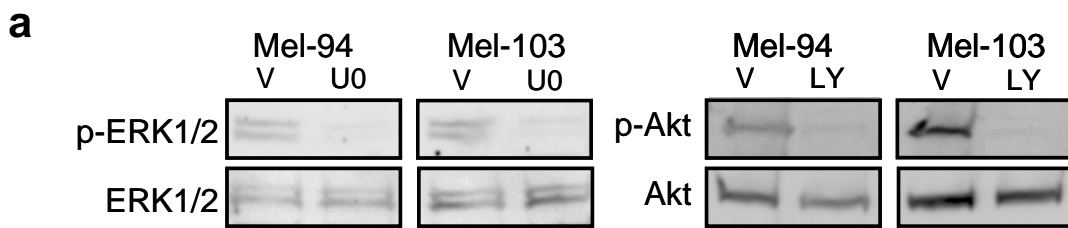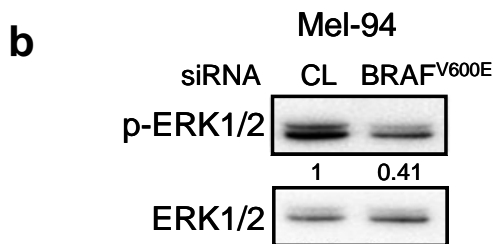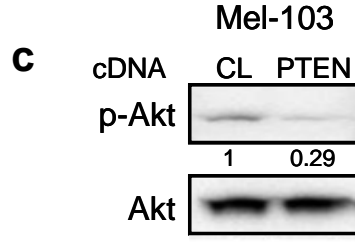

| siRNA               | CL      |          | BRAF <sup>V600E</sup> |          |
|---------------------|---------|----------|-----------------------|----------|
| shRNA               | CL      | M1       | CL                    | M1       |
| SA-β-Gal+ cells (%) | 6.5±1.5 | 56.5±4.5 | 4.5±2.5               | 29.0±7.0 |

| cDNA                | CL      |          | PTEN    |          |
|---------------------|---------|----------|---------|----------|
| shRNA               | CL      | M1       | CL      | M1       |
| SA-β-Gal+ cells (%) | 6.0±3.0 | 79.5±2.5 | 7.5±2.5 | 36.0±3.0 |

**d**

| shRNA               | CL      |         | M1         |            |
|---------------------|---------|---------|------------|------------|
|                     | DMSO    | Rap     | DMSO       | Rap        |
| SA-β-Gal+ cells (%) | 4.7±1.8 | 2.7±1.0 | 74.0 ± 3.3 | 25.6 ± 1.5 |
| Vacuolized          | 3.6±1.8 | 2.7±0.4 | 54.0 ± 4.0 | 16.0 ± 4.0 |

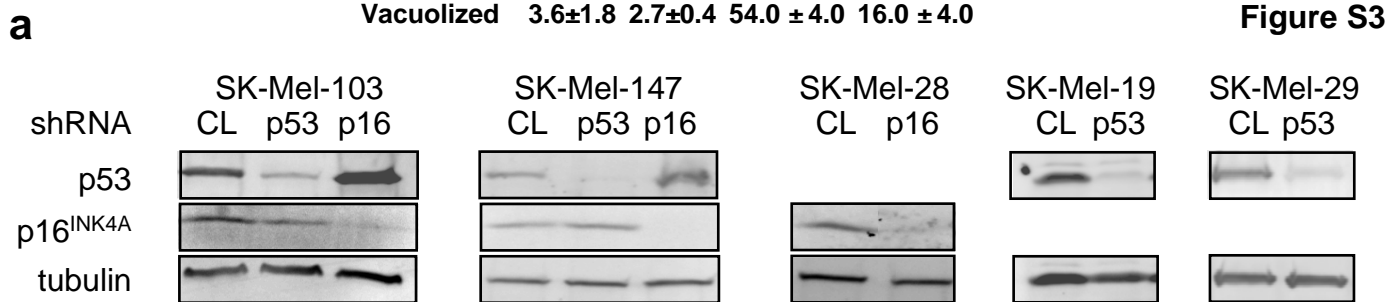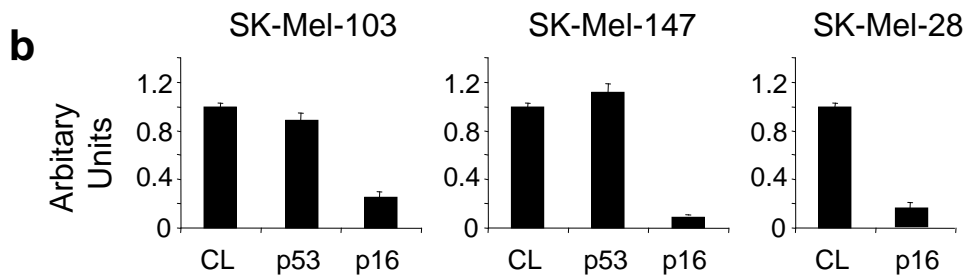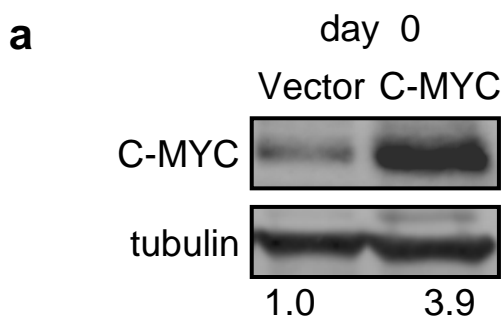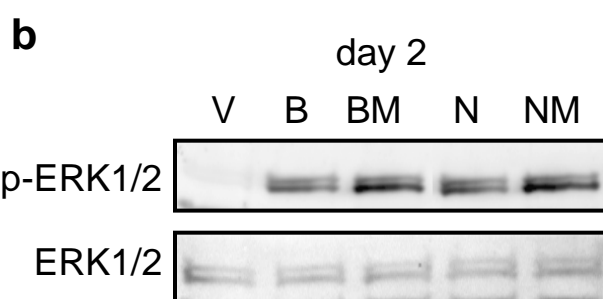

Figure S3

Figure S4

Figure S5
